# Supplementary material for: Assessing the replicability of spatial gene expression using atlas data from the adult mouse brain
Source: PubMed Central journal article supplement (PMC8321401; doi:10.1371/journal.pbio.3001341), 2021-07-19
Supplement: pbio.3001341.s012.pdf [file pbio.3001341.s012.pdf]

**Supplementary Table 1**

Cross-Dataset Classification Performance (mean AUROC)

|                     | ST to ABA   |       | ABA to ST   |       |
|---------------------|-------------|-------|-------------|-------|
|                     | within test | cross | within test | cross |
| Batch Corrected     | 0.897       | 0.838 | 0.991       | 0.715 |
| Not Batch Corrected | 0.897       | 0.839 | 0.998       | 0.734 |
