# Supplementary material for: Assessing the replicability of spatial gene expression using atlas data from the adult mouse brain
Source: PubMed Central journal article supplement (PMC8321401; doi:10.1371/journal.pbio.3001341), 2021-07-19
Supplement: pbio.3001341.s013.pdf [file pbio.3001341.s013.pdf]

## Supplementary Table 2

ST to ABA LASSO, alpha=0.1

auroc file = "STtoABA\_ABAall\_f1\_0p1\_051420.csv"

| AUROC = 1; path length = 2 |          |                                                  |        |              |           |                                                   |        |
|----------------------------|----------|--------------------------------------------------|--------|--------------|-----------|---------------------------------------------------|--------|
| Brain Area 1               |          |                                                  |        | Brain Area 2 |           |                                                   |        |
| id                         | acronym  | name                                             | parent | id           | acronym   | name                                              | parent |
| 9                          | SSp-tr6a | Primary somatosensory area, trunk, layer 6a      | 361    | 1086         | SSp-tr4   | Primary somatosensory area, trunk, layer 4        | 361    |
| 9                          | SSp-tr6a | Primary somatosensory area, trunk, layer 6a      | 361    | 670          | SSp-tr2/3 | Primary somatosensory area, trunk, layer 2/3      | 361    |
| 1005                       | AUDp6b   | Primary auditory area, layer 6b                  | 1002   | 735          | AUDp1     | Primary auditory area, layer 1                    | 1002   |
| 1102                       | SSp-m6a  | Primary somatosensory area, mouth, layer 6a      | 345    | 950          | SSp-m4    | Primary somatosensory area, mouth, layer 4        | 345    |
| 1066                       | VISam2/3 | Anteromedial visual area, layer 2/3              | 394    | 1046         | VISam6a   | Anteromedial visual area, layer 6a                | 394    |
| 308                        | PTLp6a   | Posterior parietal association areas, layer 6a   | 22     | 241          | PTLp2/3   | Posterior parietal association areas, layer 2/3   | 22     |
| 1030                       | SSp-ll1  | Primary somatosensory area, lower limb, layer 1  | 337    | 478          | SSp-ll6a  | Primary somatosensory area, lower limb, layer 6a  | 337    |
| 905                        | VISal2/3 | Anterolateral visual area, layer 2/3             | 402    | 601          | VISal6a   | Anterolateral visual area, layer 6a               | 402    |
| 600                        | AUDd2/3  | Dorsal auditory area, layer 2/3                  | 1011   | 156          | AUDd6a    | Dorsal auditory area, layer 6a                    | 1011   |
| 251                        | AUDp2/3  | Primary auditory area, layer 2/3                 | 1002   | 847          | AUDp5     | Primary auditory area, layer 5                    | 1002   |
| 583                        | CLA      | Clastrum                                         | 703    | 780          | PA        | Posterior amygdalar nucleus                       | 703    |
| 1035                       | SSs4     | Supplemental somatosensory area, layer 4         | 378    | 862          | SSs6a     | Supplemental somatosensory area, layer 6a         | 378    |
| 729                        | TEa6a    | Temporal association areas, layer 6a             | 541    | 97           | TEa1      | Temporal association areas, layer 1               | 541    |
| 478                        | SSp-ll6a | Primary somatosensory area, lower limb, layer 6a | 337    | 113          | SSp-ll2/3 | Primary somatosensory area, lower limb, layer 2/3 | 337    |
| 816                        | AUDp4    | Primary auditory area, layer 4                   | 1002   | 954          | AUDp6a    | Primary auditory area, layer 6a                   | 1002   |

| AUROC <= 0.5; path length = 2 |           |                                                               |        |              |           |                                                               |        |
|-------------------------------|-----------|---------------------------------------------------------------|--------|--------------|-----------|---------------------------------------------------------------|--------|
| Brain Area 1                  |           |                                                               |        | Brain Area 2 |           |                                                               |        |
| id                            | acronym   | name                                                          | parent | id           | acronym   | name                                                          | parent |
| 1114                          | VISal4    | Anterolateral visual area, layer 4                            | 402    | 1074         | VISal1    | Anterolateral visual area, layer 1                            | 402    |
| 606                           | RSPv2     | Retrosplenial area, ventral part, layer 2                     | 886    | 622          | RSPv6b    | Retrosplenial area, ventral part, layer 6b                    | 886    |
| 472                           | MEApd-a   | Medial amygdalar nucleus, posterodorsal part, sublayer a      | 426    | 480          | MEApd-b   | Medial amygdalar nucleus, posterodorsal part, sublayer b      | 426    |
| 1072                          | MGd       | Medial geniculate complex, dorsal part                        | 475    | 1088         | MGm       | Medial geniculate complex, medial part                        | 475    |
| 1088                          | MGm       | Medial geniculate complex, medial part                        | 475    | 1079         | MGv       | Medial geniculate complex, ventral part                       | 475    |
| 980                           | PMd       | Dorsal premammillary nucleus                                  | 467    | 1004         | PMv       | Ventral premammillary nucleus                                 | 467    |
| 559                           | CEAm      | Central amygdalar nucleus, medial part                        | 536    | 544          | CEAc      | Central amygdalar nucleus, capsular part                      | 536    |
| 281                           | VISam1    | Anteromedial visual area, layer 1                             | 394    | 1066         | VISam2/3  | Anteromedial visual area, layer 2/3                           | 394    |
| 1042                          | TTd2      | Taenia tecta, dorsal part, layer 2                            | 597    | 1050         | TTd3      | Taenia tecta, dorsal part, layer 3                            | 597    |
| 148                           | GU4       | Gustatory areas, layer 4                                      | 1057   | 187          | GU5       | Gustatory areas, layer 5                                      | 1057   |
| 148                           | GU4       | Gustatory areas, layer 4                                      | 1057   | 662          | GU6b      | Gustatory areas, layer 6b                                     | 1057   |
| 783                           | Ald6a     | Agranular insular area, dorsal part, layer 6a                 | 104    | 1101         | Ald5      | Agranular insular area, dorsal part, layer 5                  | 104    |
| 381                           | SNr       | Substantia nigra, reticular part                              | 323    | 616          | CUN       | Cuneiform nucleus                                             | 323    |
| 74                            | VISI6a    | Lateral visual area, layer 6a                                 | 409    | 973          | VISI2/3   | Lateral visual area, layer 2/3                                | 409    |
| 74                            | VISI6a    | Lateral visual area, layer 6a                                 | 409    | 421          | VISI1     | Lateral visual area, layer 1                                  | 409    |
| 416                           | PAA2      | Piriform-amygdalar area, pyramidal layer                      | 788    | 424          | PAA3      | Piriform-amygdalar area, polymorph layer                      | 788    |
| 868                           | PBlv      | Parabrachial nucleus, lateral division, dorsal lateral part   | 881    | 891          | PBlv      | Parabrachial nucleus, lateral division, ventral lateral part  | 881    |
| 1106                          | VISC2/3   | Visceral area, layer 2/3                                      | 677    | 897          | VISC1     | Visceral area, layer 1                                        | 677    |
| 194                           | LHA       | Lateral hypothalamic area                                     | 290    | 173          | RCH       | Retrochiasmatic area                                          | 290    |
| 194                           | LHA       | Lateral hypothalamic area                                     | 290    | 226          | LPO       | Lateral preoptic area                                         | 290    |
| 194                           | LHA       | Lateral hypothalamic area                                     | 290    | 364          | PSTN      | Parasubthalamic nucleus                                       | 290    |
| 368                           | PERI6b    | Perirhinal area, layer 6b                                     | 922    | 692          | PERI5     | Perirhinal area, layer 5                                      | 922    |
| 368                           | PERI6b    | Perirhinal area, layer 6b                                     | 922    | 888          | PERI2/3   | Perirhinal area, layer 2/3                                    | 922    |
| 1102                          | SSp-m6a   | Primary somatosensory area, mouth, layer 6a                   | 345    | 2            | SSp-m6b   | Primary somatosensory area, mouth, layer 6b                   | 345    |
| 969                           | ORBvl1    | Orbital area, ventrolateral part, layer 1                     | 746    | 608          | ORBvl6a   | Orbital area, ventrolateral part, layer 6a                    | 746    |
| 401                           | VISam4    | Anteromedial visual area, layer 4                             | 394    | 1046         | VISam6a   | Anteromedial visual area, layer 6a                            | 394    |
| 401                           | VISam4    | Anteromedial visual area, layer 4                             | 394    | 441          | VISam6b   | Anteromedial visual area, layer 6b                            | 394    |
| 540                           | PERI1     | Perirhinal area, layer 1                                      | 922    | 692          | PERI5     | Perirhinal area, layer 5                                      | 922    |
| 540                           | PERI1     | Perirhinal area, layer 1                                      | 922    | 888          | PERI2/3   | Perirhinal area, layer 2/3                                    | 922    |
| 189                           | RH        | Rhomboid nucleus                                              | 51     | 599          | CM        | Central medial nucleus of the thalamus                        | 51     |
| 880                           | DTN       | Dorsal tegmental nucleus                                      | 987    | 898          | PCG       | Pontine central gray                                          | 987    |
| 1066                          | VISam2/3  | Anteromedial visual area, layer 2/3                           | 394    | 441          | VISam6b   | Anteromedial visual area, layer 6b                            | 394    |
| 255                           | AV        | Anteroventral nucleus of thalamus                             | 239    | 1113         | IAD       | Interanterodorsal nucleus of the thalamus                     | 239    |
| 965                           | RSPagl2/3 | Retrosplenial area, lateral agranular part, layer 2/3         | 894    | 774          | RSPagl5   | Retrosplenial area, lateral agranular part, layer 5           | 894    |
| 167                           | AONd      | Anterior olfactory nucleus, dorsal part                       | 159    | 160          | AON1      | Anterior olfactory nucleus, layer 1                           | 159    |
| 167                           | AONd      | Anterior olfactory nucleus, dorsal part                       | 159    | 183          | AONI      | Anterior olfactory nucleus, lateral part                      | 159    |
| 308                           | PTLp6a    | Posterior parietal association areas, layer 6a                | 22     | 340          | PTLp6b    | Posterior parietal association areas, layer 6b                | 22     |
| 272                           | AVPV      | Anteroventral periventricular nucleus                         | 141    | 286          | SCH       | Suprachiasmatic nucleus                                       | 141    |
| 272                           | AVPV      | Anteroventral periventricular nucleus                         | 141    | 523          | MPO       | Medial preoptic area                                          | 141    |
| 1081                          | ILA6b     | Infralimbic area, layer 6b                                    | 44     | 707          | ILA1      | Infralimbic area, layer 1                                     | 44     |
| 1081                          | ILA6b     | Infralimbic area, layer 6b                                    | 44     | 827          | ILAS      | Infralimbic area, layer 5                                     | 44     |
| 1081                          | ILA6b     | Infralimbic area, layer 6b                                    | 44     | 556          | ILA2/3    | Infralimbic area, layer 2/3                                   | 44     |
| 263                           | AVP       | Anteroventral preoptic nucleus                                | 141    | 126          | PVP       | Periventricular hypothalamic nucleus, posterior part          | 141    |
| 1093                          | PRNc      | Pontine reticular nucleus, caudal part                        | 987    | 534          | SUT       | Supratrigeminal nucleus                                       | 987    |
| 240                           | COApm1    | Cortical amygdalar area, posterior part, medial zone, layer 1 | 663    | 248          | COApm2    | Cortical amygdalar area, posterior part, medial zone, layer 2 | 663    |
| 687                           | RSPv5     | Retrosplenial area, ventral part, layer 5                     | 886    | 622          | RSPv6b    | Retrosplenial area, ventral part, layer 6b                    | 886    |
| 139                           | ENTI5     | Entorhinal area, lateral part, layer 5                        | 918    | 92           | ENTI4     | Entorhinal area, lateral part, layer 4                        | 918    |
| 1030                          | SSp-ll1   | Primary somatosensory area, lower limb, layer 1               | 337    | 113          | SSp-ll2/3 | Primary somatosensory area, lower limb, layer 2/3             | 337    |
| 574                           | TRN       | Tegmental reticular nucleus                                   | 987    | 534          | SUT       | Supratrigeminal nucleus                                       | 987    |
| 837                           | SUBd-sr   | Subiculum, dorsal part, stratum radiatum                      | 509    | 845          | SUBd-sp   | Subiculum, dorsal part, pyramidal layer                       | 509    |
| 935                           | ACAd1     | Anterior cingulate area, dorsal part, layer 1                 | 39     | 211          | ACAd2/3   | Anterior cingulate area, dorsal part, layer 2/3               | 39     |
| 897                           | VISC1     | Visceral area, layer 1                                        | 677    | 857          | VISC6a    | Visceral area, layer 6a                                       | 677    |

|               |                                                                 |      |              |                                                                  |      |
|---------------|-----------------------------------------------------------------|------|--------------|------------------------------------------------------------------|------|
| 575 CL        | Central lateral nucleus of the thalamus                         | 51   | 599 CM       | Central medial nucleus of the thalamus                           | 51   |
| 1074 VISal1   | Anterolateral visual area, layer 1                              | 402  | 905 VISal2/3 | Anterolateral visual area, layer 2/3                             | 402  |
| 1074 VISal1   | Anterolateral visual area, layer 1                              | 402  | 233 VISal5   | Anterolateral visual area, layer 5                               | 402  |
| 544 CEAc      | Central amygdalar nucleus, capsular part                        | 536  | 551 CEAl     | Central amygdalar nucleus, lateral part                          | 536  |
| 431 CA2slm    | Field CA2, stratum lacunosum-moleculare                         | 423  | 454 CA2sr    | Field CA2, stratum radiatum                                      | 423  |
| 303 BLAa      | Basolateral amygdalar nucleus, anterior part                    | 295  | 451 BLAv     | Basolateral amygdalar nucleus, ventral part                      | 295  |
| 266 LSV       | Lateral septal nucleus, ventral part                            | 242  | 258 LSR      | Lateral septal nucleus, rostral (rostroventral) part             | 242  |
| 527 AUDd1     | Dorsal auditory area, layer 1                                   | 1011 | 600 AUDd2/3  | Dorsal auditory area, layer 2/3                                  | 1011 |
| 646 DP5       | Dorsal peduncular area, layer 5                                 | 814  | 496 DP1      | Dorsal peduncular area, layer 1                                  | 814  |
| 118 PVi       | Periventricular hypothalamic nucleus, intermediate part         | 157  | 223 ARH      | Arcuate hypothalamic nucleus                                     | 157  |
| 616 CUN       | Cuneiform nucleus                                               | 323  | 214 RN       | Red nucleus                                                      | 323  |
| 772 ACAv5     | Anterior cingulate area, ventral part, layer 5                  | 48   | 810 ACAv6a   | Anterior cingulate area, ventral part, 6a                        | 48   |
| 269 VISpl2/3  | Posterolateral visual area, layer 2/3                           | 425  | 377 VISpl6a  | Posterolateral visual area, layer 6a                             | 425  |
| 269 VISpl2/3  | Posterolateral visual area, layer 2/3                           | 425  | 902 VISpl5   | Posterolateral visual area, layer 5                              | 425  |
| 486 CA3so     | Field CA3, stratum oriens                                       | 463  | 471 CA3slm   | Field CA3, stratum lacunosum-moleculare                          | 463  |
| 1075 TTV2     | Taenia tecta, ventral part, layer 2                             | 605  | 1082 TTV3    | Taenia tecta, ventral part, layer 3                              | 605  |
| 501 VISpm4    | posteromedial visual area, layer 4                              | 533  | 257 VISpm6a  | posteromedial visual area, layer 6a                              | 533  |
| 92 ENT14      | Entorhinal area, lateral part, layer 4                          | 918  | 999 ENT12/3  | Entorhinal area, lateral part, layer 2/3                         | 918  |
| 617 MDc       | Mediodorsal nucleus of the thalamus, central part               | 362  | 636 MDm      | Mediodorsal nucleus of the thalamus, medial part                 | 362  |
| 1045 ECT6b    | Ectorhinal area/Layer 6b                                        | 895  | 977 ECT6a    | Ectorhinal area/Layer 6a                                         | 895  |
| 28 ENT16a     | Entorhinal area, lateral part, layer 6a                         | 918  | 60 ENT16b    | Entorhinal area, lateral part, layer 6b                          | 918  |
| 243 AUDd6b    | Dorsal auditory area, layer 6b                                  | 1011 | 156 AUDd6a   | Dorsal auditory area, layer 6a                                   | 1011 |
| 52 ENT13      | Entorhinal area, lateral part, layer 3                          | 918  | 999 ENT12/3  | Entorhinal area, lateral part, layer 2/3                         | 918  |
| 1142 TR3      | Postpiriform transition area, layers 3                          | 566  | 1141 TR2     | Postpiriform transition area, layers 2                           | 566  |
| 10694 PAR2    | Parasubiculum, layer 2                                          | 843  | 10695 PAR3   | Parasubiculum, layer 3                                           | 843  |
| 712 ENTm4     | Entorhinal area, medial part, dorsal zone, layer 4              | 926  | 664 ENTm3    | Entorhinal area, medial part, dorsal zone, layer 3               | 926  |
| 712 ENTm4     | Entorhinal area, medial part, dorsal zone, layer 4              | 926  | 727 ENTm5    | Entorhinal area, medial part, dorsal zone, layer 5               | 926  |
| 565 VISpm5    | posteromedial visual area, layer 5                              | 533  | 257 VISpm6a  | posteromedial visual area, layer 6a                              | 533  |
| 883 PBIa      | Parabrachial nucleus, lateral division, superior lateral part   | 881  | 891 PBIv     | Parabrachial nucleus, lateral division, ventral lateral part     | 881  |
| 1026 SSp-ul6b | Primary somatosensory area, upper limb, layer 6b                | 369  | 945 SSp-ul6a | Primary somatosensory area, upper limb, layer 6a                 | 369  |
| 471 CA3slm    | Field CA3, stratum lacunosum-moleculare                         | 463  | 479 CA3slu   | Field CA3, stratum lucidum                                       | 463  |
| 471 CA3slm    | Field CA3, stratum lacunosum-moleculare                         | 463  | 495 CA3sp    | Field CA3, pyramidal layer                                       | 463  |
| 872 DR        | Dorsal nucleus raphe                                            | 165  | 100 IPN      | Interpeduncular nucleus                                          | 165  |
| 460 MEV       | Midbrain trigeminal nucleus                                     | 339  | 580 NB       | Nucleus of the brachium of the inferior colliculus               | 339  |
| 162 LDT       | Laterodorsal tegmental nucleus                                  | 1117 | 358 SLD      | Sublaterodorsal nucleus                                          | 1117 |
| 757 VTN       | Ventral tegmental nucleus                                       | 323  | 246 RR       | Midbrain reticular nucleus, retrorubral area                     | 323  |
| 523 MPO       | Medial preoptic area                                            | 141  | 347 SBPV     | Subparaventricular zone                                          | 141  |
| 523 MPO       | Medial preoptic area                                            | 141  | 126 PVP      | Periventricular hypothalamic nucleus, posterior part             | 141  |
| 1010 VISC4    | Visceral area, layer 4                                          | 677  | 1058 VISC5   | Visceral area, layer 5                                           | 677  |
| 1105 IA       | Intercalated amygdalar nucleus                                  | 278  | 23 AAA       | Anterior amygdalar area                                          | 278  |
| 149 PVT       | Paraventricular nucleus of the thalamus                         | 571  | 15 PT        | Parataenial nucleus                                              | 571  |
| 604 NI        | Nucleus incertus                                                | 1117 | 238 RPO      | Nucleus raphe pontis                                             | 1117 |
| 564 MS        | Medial septal nucleus                                           | 904  | 596 NDB      | Diagonal band nucleus                                            | 904  |
| 860 PBIc      | Parabrachial nucleus, lateral division, central lateral part    | 881  | 875 PBIe     | Parabrachial nucleus, lateral division, external lateral part    | 881  |
| 860 PBIc      | Parabrachial nucleus, lateral division, central lateral part    | 881  | 891 PBIv     | Parabrachial nucleus, lateral division, ventral lateral part     | 881  |
| 800 AIV5      | Agranular insular area, ventral part, layer 5                   | 119  | 704 AIV1     | Agranular insular area, ventral part, layer 1                    | 119  |
| 907 PCN       | Paracentral nucleus                                             | 51   | 599 CM       | Central medial nucleus of the thalamus                           | 51   |
| 335 PER16a    | Perirhinal area, layer 6a                                       | 922  | 888 PER12/3  | Perirhinal area, layer 2/3                                       | 922  |
| 84 PL6a       | Prelimbic area, layer 6a                                        | 972  | 363 PL5      | Prelimbic area, layer 5                                          | 972  |
| 724 AHNp      | Anterior hypothalamic nucleus, posterior part                   | 88   | 708 AHNc     | Anterior hypothalamic nucleus, central part                      | 88   |
| 347 SBPV      | Subparaventricular zone                                         | 141  | 126 PVP      | Periventricular hypothalamic nucleus, posterior part             | 141  |
| 591 CLI       | Central linear nucleus raphe                                    | 165  | 100 IPN      | Interpeduncular nucleus                                          | 165  |
| 973 VISI2/3   | Lateral visual area, layer 2/3                                  | 409  | 421 VISI1    | Lateral visual area, layer 1                                     | 409  |
| 810 ACAv6a    | Anterior cingulate area, ventral part, 6a                       | 48   | 588 ACAv1    | Anterior cingulate area, ventral part, layer 1                   | 48   |
| 700 AHNa      | Anterior hypothalamic nucleus, anterior part                    | 88   | 708 AHNc     | Anterior hypothalamic nucleus, central part                      | 88   |
| 232 COApl3    | Cortical amygdalar area, posterior part, lateral zone, layer 3  | 655  | 224 COApl2   | Cortical amygdalar area, posterior part, lateral zone, layer 2   | 655  |
| 377 VISpl6a   | Posterolateral visual area, layer 6a                            | 425  | 902 VISpl5   | Posterolateral visual area, layer 5                              | 425  |
| 1125 ORBvl5   | Orbital area, ventrolateral part, layer 5                       | 746  | 288 ORBvl2/3 | Orbital area, ventrolateral part, layer 2/3                      | 746  |
| 845 SUBd-sp   | Subiculum, dorsal part, pyramidal layer                         | 509  | 829 SUBd-m   | Subiculum, dorsal part, molecular layer                          | 509  |
| 1015 ACAd5    | Anterior cingulate area, dorsal part, layer 5                   | 39   | 919 ACAd6a   | Anterior cingulate area, dorsal part, layer 6a                   | 39   |
| 216 COApl1    | Cortical amygdalar area, posterior part, lateral zone, layer 1  | 655  | 224 COApl2   | Cortical amygdalar area, posterior part, lateral zone, layer 2   | 655  |
| 613 VISI5     | Lateral visual area, layer 5                                    | 409  | 421 VISI1    | Lateral visual area, layer 1                                     | 409  |
| 10693 PAR1    | Parasubiculum, layer 1                                          | 843  | 10695 PAR3   | Parasubiculum, layer 3                                           | 843  |
| 56 ACB        | Nucleus accumbens                                               | 493  | 998 FS       | Fundus of striatum                                               | 493  |
| 10701 PRE3    | Presubiculum, layer 3                                           | 1084 | 10700 PRE2   | Presubiculum, layer 2                                            | 1084 |
| 664 ENTm3     | Entorhinal area, medial part, dorsal zone, layer 3              | 926  | 727 ENTm5    | Entorhinal area, medial part, dorsal zone, layer 5               | 926  |
| 358 SLD       | Sublaterodorsal nucleus                                         | 1117 | 238 RPO      | Nucleus raphe pontis                                             | 1117 |
| 268 NLOT2     | Nucleus of the lateral olfactory tract, pyramidal layer         | 619  | 1139 NLOT3   | Nucleus of the lateral olfactory tract, layer 3                  | 619  |
| 268 NLOT2     | Nucleus of the lateral olfactory tract, pyramidal layer         | 619  | 260 NLOT1    | Nucleus of the lateral olfactory tract, molecular layer          | 619  |
| 479 CA3slu    | Field CA3, stratum lucidum                                      | 463  | 495 CA3sp    | Field CA3, pyramidal layer                                       | 463  |
| 511 SCig-c    | Superior colliculus, motor related, intermediate gray layer, su | 10   | 494 SCig-a   | Superior colliculus, motor related, intermediate gray layer, sul | 10   |
| 310 SF        | Septofimbrial nucleus                                           | 275  | 333 SH       | Septohippocampal nucleus                                         | 275  |
| 484 ORBm1     | Orbital area, medial part, layer 1                              | 731  | 620 ORBm5    | Orbital area, medial part, layer 5                               | 731  |
| 638 GU6a      | Gustatory areas, layer 6a                                       | 1057 | 662 GU6b     | Gustatory areas, layer 6b                                        | 1057 |
| 15 PT         | Parataenial nucleus                                             | 571  | 181 RE       | Nucleus of reunions                                              | 571  |
| 478 SSp-ll6a  | Primary somatosensory area, lower limb, layer 6a                | 337  | 510 SSp-ll6b | Primary somatosensory area, lower limb, layer 6b                 | 337  |
| 598 AUDv6b    | Ventral auditory area, layer 6b                                 | 1018 | 1023 AUDv5   | Ventral auditory area, layer 5                                   | 1018 |

|      |         |                                                    |     |     |           |                                                         |     |
|------|---------|----------------------------------------------------|-----|-----|-----------|---------------------------------------------------------|-----|
| 137  | CSI     | Superior central nucleus raphe, lateral part       | 679 | 130 | CSm       | Superior central nucleus raphe, medial part             | 679 |
| 727  | ENTm5   | Entorhinal area, medial part, dorsal zone, layer 5 | 926 | 743 | ENTm6     | Entorhinal area, medial part, dorsal zone, layer 6      | 926 |
| 450  | SSp-ul1 | Primary somatosensory area, upper limb, layer 1    | 369 | 854 | SSp-ul2/3 | Primary somatosensory area, upper limb, layer 2/3       | 369 |
| 1139 | NLOT3   | Nucleus of the lateral olfactory tract, layer 3    | 619 | 260 | NLOT1     | Nucleus of the lateral olfactory tract, molecular layer | 619 |
| 440  | ORBI6a  | Orbital area, lateral part, layer 6a               | 723 | 630 | ORBI5     | Orbital area, lateral part, layer 5                     | 723 |
