# Supplementary material for: Assessing the replicability of spatial gene expression using atlas data from the adult mouse brain
Source: PubMed Central journal article supplement (PMC8321401; doi:10.1371/journal.pbio.3001341), 2021-07-19
Supplement: pbio.3001341.s014.pdf [file pbio.3001341.s014.pdf]

Supplementary Table 3

ABA to ST LASSO, alpha=0.1

auroc file = "ABAtoST\_Tall\_f1\_Op1\_051420.csv"

| AUROC >= 0.95; path length = 2 |          |                                       |        |              |         |                                      |        |
|--------------------------------|----------|---------------------------------------|--------|--------------|---------|--------------------------------------|--------|
| Brain Area 1                   |          |                                       |        | Brain Area 2 |         |                                      |        |
| id                             | acronym  | name                                  | parent | id           | acronym | name                                 | parent |
| 1005                           | AUDp6b   | Primary auditory area, layer 6b       | 1002   | 816          | AUDp4   | Primary auditory area, layer 4       | 1002   |
| 943                            | MOp2/3   | Primary motor area, Layer 2/3         | 985    | 882          | MOp6b   | Primary motor area, Layer 6b         | 985    |
| 882                            | MOp6b    | Primary motor area, Layer 6b          | 985    | 320          | MOp1    | Primary motor area, Layer 1          | 985    |
| 269                            | VISpl2/3 | Posterolateral visual area, layer 2/3 | 425    | 377          | VISpl6a | Posterolateral visual area, layer 6a | 425    |
| 1045                           | ECT6b    | Ectorhinal area/Layer 6b              | 895    | 836          | ECT1    | Ectorhinal area/Layer 1              | 895    |

| AUROC <=0.5; path length = 2 |           |                                                             |        |              |          |                                                              |        |
|------------------------------|-----------|-------------------------------------------------------------|--------|--------------|----------|--------------------------------------------------------------|--------|
| Brain Area 1                 |           |                                                             |        | Brain Area 2 |          |                                                              |        |
| id                           | acronym   | name                                                        | parent | id           | acronym  | name                                                         | parent |
| 657                          | SSp-m2/3  | Primary somatosensory area, mouth, layer 2/3                | 345    | 950          | SSp-m4   | Primary somatosensory area, mouth, layer 4                   | 345    |
| 1114                         | VISal4    | Anterolateral visual area, layer 4                          | 402    | 233          | VISal5   | Anterolateral visual area, layer 5                           | 402    |
| 606                          | RSPv2     | Retrosplenial area, ventral part, layer 2                   | 886    | 622          | RSPv6b   | Retrosplenial area, ventral part, layer 6b                   | 886    |
| 606                          | RSPv2     | Retrosplenial area, ventral part, layer 2                   | 886    | 430          | RSPv2/3  | Retrosplenial area, ventral part, layer 2/3                  | 886    |
| 472                          | MEApd-a   | Medial amygdalar nucleus, posterodorsal part, sublayer a    | 426    | 487          | MEApd-c  | Medial amygdalar nucleus, posterodorsal part, sublayer c     | 426    |
| 472                          | MEApd-a   | Medial amygdalar nucleus, posterodorsal part, sublayer a    | 426    | 480          | MEApd-b  | Medial amygdalar nucleus, posterodorsal part, sublayer b     | 426    |
| 980                          | PMd       | Dorsal premammillary nucleus                                | 467    | 946          | PH       | Posterior hypothalamic nucleus                               | 467    |
| 980                          | PMd       | Dorsal premammillary nucleus                                | 467    | 1004         | PMv      | Ventral premammillary nucleus                                | 467    |
| 296                          | ACAv2/3   | Anterior cingulate area, ventral part, layer 2/3            | 48     | 772          | ACAv5    | Anterior cingulate area, ventral part, layer 5               | 48     |
| 148                          | GU4       | Gustatory areas, layer 4                                    | 1057   | 187          | GU5      | Gustatory areas, layer 5                                     | 1057   |
| 148                          | GU4       | Gustatory areas, layer 4                                    | 1057   | 662          | GU6b     | Gustatory areas, layer 6b                                    | 1057   |
| 783                          | Ald6a     | Agranular insular area, dorsal part, layer 6a               | 104    | 1101         | Ald5     | Agranular insular area, dorsal part, layer 5                 | 104    |
| 381                          | SNr       | Substantia nigra, reticular part                            | 323    | 616          | CUN      | Cuneiform nucleus                                            | 323    |
| 381                          | SNr       | Substantia nigra, reticular part                            | 323    | 757          | VTN      | Ventral tegmental nucleus                                    | 323    |
| 191                          | AONm      | Anterior olfactory nucleus, medial part                     | 159    | 167          | AONd     | Anterior olfactory nucleus, dorsal part                      | 159    |
| 416                          | PAA2      | Piriform-amygdalar area, pyramidal layer                    | 788    | 424          | PAA3     | Piriform-amygdalar area, polymorph layer                     | 788    |
| 868                          | PBlid     | Parabrachial nucleus, lateral division, dorsal lateral part | 881    | 860          | PBlc     | Parabrachial nucleus, lateral division, central lateral part | 881    |
| 868                          | PBlid     | Parabrachial nucleus, lateral division, dorsal lateral part | 881    | 891          | PBlv     | Parabrachial nucleus, lateral division, ventral lateral part | 881    |
| 1106                         | VISC2/3   | Visceral area, layer 2/3                                    | 677    | 1058         | VISC5    | Visceral area, layer 5                                       | 677    |
| 628                          | NOT       | Nucleus of the optic tract                                  | 1100   | 634          | NPC      | Nucleus of the posterior commissure                          | 1100   |
| 628                          | NOT       | Nucleus of the optic tract                                  | 1100   | 215          | APN      | Anterior pretectal nucleus                                   | 1100   |
| 105                          | SOCm      | Superior olivary complex, medial part                       | 398    | 122          | POR      | Superior olivary complex, periolivary region                 | 398    |
| 194                          | LHA       | Lateral hypothalamic area                                   | 290    | 364          | PSTN     | Parasubthalamic nucleus                                      | 290    |
| 1062                         | SSp-bfd6b | Primary somatosensory area, barrel field, layer 6b          | 329    | 1070         | SSp-bfd5 | Primary somatosensory area, barrel field, layer 5            | 329    |
| 465                          | OT2       | Olfactory tubercle, pyramidal layer                         | 754    | 473          | OT3      | Olfactory tubercle, polymorph layer                          | 754    |
| 465                          | OT2       | Olfactory tubercle, pyramidal layer                         | 754    | 481          | isl      | Islands of Calleja                                           | 754    |
| 1102                         | SSp-m6a   | Primary somatosensory area, mouth, layer 6a                 | 345    | 878          | SSp-m1   | Primary somatosensory area, mouth, layer 1                   | 345    |
| 1102                         | SSp-m6a   | Primary somatosensory area, mouth, layer 6a                 | 345    | 2            | SSp-m6b  | Primary somatosensory area, mouth, layer 6b                  | 345    |
| 189                          | RH        | Rhomboid nucleus                                            | 51     | 575          | CL       | Central lateral nucleus of the thalamus                      | 51     |
| 694                          | Alv2/3    | Agranular insular area, ventral part, layer 2/3             | 119    | 800          | Alv5     | Agranular insular area, ventral part, layer 5                | 119    |
| 344                          | Alp5      | Agranular insular area, posterior part, layer 5             | 111    | 314          | Alp6a    | Agranular insular area, posterior part, layer 6a             | 111    |
| 965                          | RSPag12/3 | Retrosplenial area, lateral agranular part, layer 2/3       | 894    | 774          | RSPag15  | Retrosplenial area, lateral agranular part, layer 5          | 894    |
| 272                          | AVPV      | Anteroventral periventricular nucleus                       | 141    | 523          | MPO      | Medial preoptic area                                         | 141    |
| 272                          | AVPV      | Anteroventral periventricular nucleus                       | 141    | 347          | SBPV     | Subparaventricular zone                                      | 141    |
| 263                          | AVP       | Anteroventral preoptic nucleus                              | 141    | 286          | SCH      | Suprachiasmatic nucleus                                      | 141    |
| 263                          | AVP       | Anteroventral preoptic nucleus                              | 141    | 523          | MPO      | Medial preoptic area                                         | 141    |
| 263                          | AVP       | Anteroventral preoptic nucleus                              | 141    | 126          | PVp      | Periventricular hypothalamic nucleus, posterior part         | 141    |
| 458                          | OT1       | Olfactory tubercle, molecular layer                         | 754    | 481          | isl      | Islands of Calleja                                           | 754    |
| 687                          | RSPv5     | Retrosplenial area, ventral part, layer 5                   | 886    | 430          | RSPv2/3  | Retrosplenial area, ventral part, layer 2/3                  | 886    |
| 292                          | BA        | Bed nucleus of the accessory olfactory tract                | 278    | 1105         | IA       | Intercalated amygdalar nucleus                               | 278    |
| 635                          | PTLp4     | Posterior parietal association areas, layer 4               | 22     | 241          | PTLp2/3  | Posterior parietal association areas, layer 2/3              | 22     |
| 683                          | PTLp5     | Posterior parietal association areas, layer 5               | 22     | 241          | PTLp2/3  | Posterior parietal association areas, layer 2/3              | 22     |
| 622                          | RSPv6b    | Retrosplenial area, ventral part, layer 6b                  | 886    | 590          | RSPv6a   | Retrosplenial area, ventral part, layer 6a                   | 886    |
| 622                          | RSPv6b    | Retrosplenial area, ventral part, layer 6b                  | 886    | 430          | RSPv2/3  | Retrosplenial area, ventral part, layer 2/3                  | 886    |
| 1086                         | SSp-tr4   | Primary somatosensory area, trunk, layer 4                  | 361    | 461          | SSp-tr6b | Primary somatosensory area, trunk, layer 6b                  | 361    |
| 305                          | VISp6b    | Primary visual area, layer 6b                               | 385    | 33           | VISp6a   | Primary visual area, layer 6a                                | 385    |
| 837                          | SUBd-sr   | Subiculum, dorsal part, stratum radiatum                    | 509    | 845          | SUBd-sp  | Subiculum, dorsal part, pyramidal layer                      | 509    |
| 544                          | CEAc      | Central amygdalar nucleus, capsular part                    | 536    | 551          | CEAl     | Central amygdalar nucleus, lateral part                      | 536    |
| 411                          | MEAad     | Medial amygdalar nucleus, anterodorsal part                 | 403    | 418          | MEAav    | Medial amygdalar nucleus, anteroventral part                 | 403    |
| 614                          | TU        | Tuberal nucleus                                             | 290    | 173          | RCH      | Retrochiasmatic area                                         | 290    |
| 614                          | TU        | Tuberal nucleus                                             | 290    | 226          | LPO      | Lateral preoptic area                                        | 290    |
| 187                          | GU5       | Gustatory areas, layer 5                                    | 1057   | 662          | GU6b     | Gustatory areas, layer 6b                                    | 1057   |
| 41                           | VISpm2/3  | posteromedial visual area, layer 2/3                        | 533    | 565          | VISpm5   | posteromedial visual area, layer 5                           | 533    |
| 303                          | BLAa      | Basolateral amygdalar nucleus, anterior part                | 295    | 451          | BLAv     | Basolateral amygdalar nucleus, ventral part                  | 295    |
| 654                          | SSp-n4    | Primary somatosensory area, nose, layer 4                   | 353    | 838          | SSp-n2/3 | Primary somatosensory area, nose, layer 2/3                  | 353    |
| 266                          | LSv       | Lateral septal nucleus, ventral part                        | 242    | 258          | LSr      | Lateral septal nucleus, rostral (rostroventral) part         | 242    |
| 304                          | PL2/3     | Prelimbic area, layer 2/3                                   | 972    | 363          | PL5      | Prelimbic area, layer 5                                      | 972    |
| 646                          | DP5       | Dorsal peduncular area, layer 5                             | 814    | 360          | DP2/3    | Dorsal peduncular area, layer 2/3                            | 814    |
| 412                          | ORB12/3   | Orbital area, lateral part, layer 2/3                       | 723    | 448          | ORB1     | Orbital area, lateral part, layer 1                          | 723    |
| 616                          | CUN       | Cuneiform nucleus                                           | 323    | 757          | VTN      | Ventral tegmental nucleus                                    | 323    |
| 772                          | ACAv5     | Anterior cingulate area, ventral part, layer 5              | 48     | 588          | ACAv1    | Anterior cingulate area, ventral part, layer 1               | 48     |
| 286                          | SCH       | Suprachiasmatic nucleus                                     | 141    | 347          | SBPV     | Subparaventricular zone                                      | 141    |
| 486                          | CA3so     | Field CA3, stratum oriens                                   | 463    | 471          | CA3sm    | Field CA3, stratum lacunosum-moleculare                      | 463    |
| 1075                         | TTv2      | Taenia tecta, ventral part, layer 2                         | 605    | 1082         | TTv3     | Taenia tecta, ventral part, layer 3                          | 605    |
| 692                          | PERI5     | Perirhinal area, layer 5                                    | 922    | 335          | PERI6a   | Perirhinal area, layer 6a                                    | 922    |
| 501                          | VISpm4    | posteromedial visual area, layer 4                          | 533    | 565          | VISpm5   | posteromedial visual area, layer 5                           | 533    |
| 233                          | VISal5    | Anterolateral visual area, layer 5                          | 402    | 649          | VISal6b  | Anterolateral visual area, layer 6b                          | 402    |
| 233                          | VISal5    | Anterolateral visual area, layer 5                          | 402    | 601          | VISal6a  | Anterolateral visual area, layer 6a                          | 402    |
| 520                          | AUDv6a    | Ventral auditory area, layer 6a                             | 1018   | 598          | AUDv6b   | Ventral auditory area, layer 6b                              | 1018   |
| 1045                         | ECT6b     | Ectorhinal area/Layer 6b                                    | 895    | 977          | ECT6a    | Ectorhinal area/Layer 6a                                     | 895    |
| 52                           | ENT13     | Entorhinal area, lateral part, layer 3                      | 918    | 715          | ENT12a   | Entorhinal area, lateral part, layer 2a                      | 918    |

|               |                                                                           |      |              |                                                                                 |      |
|---------------|---------------------------------------------------------------------------|------|--------------|---------------------------------------------------------------------------------|------|
| 473 OT3       | Olfactory tubercle, polymorph layer                                       | 754  | 481 isl      | Islands of Calleja                                                              | 754  |
| 712 ENTm4     | Entorhinal area, medial part, dorsal zone, layer 4                        | 926  | 664 ENTm3    | Entorhinal area, medial part, dorsal zone, layer 3                              | 926  |
| 883 PBIs      | Parabrachial nucleus, lateral division, superior lateral part             | 881  | 891 PBlv     | Parabrachial nucleus, lateral division, ventral lateral part                    | 881  |
| 471 CA3slm    | Field CA3, stratum lacunosum-moleculare                                   | 463  | 495 CA3sp    | Field CA3, pyramidal layer                                                      | 463  |
| 670 SSp-tr2/3 | Primary somatosensory area, trunk, layer 2/3                              | 361  | 461 SSp-tr6b | Primary somatosensory area, trunk, layer 6b                                     | 361  |
| 872 DR        | Dorsal nucleus raphe                                                      | 165  | 591 CLI      | Central linear nucleus raphe                                                    | 165  |
| 460 MEV       | Midbrain trigeminal nucleus                                               | 339  | 580 NB       | Nucleus of the brachium of the inferior colliculus                              | 339  |
| 537 BSTal     | Bed nuclei of the stria terminalis, anterior division, anterolateral area | 359  | 498 BSTam    | Bed nuclei of the stria terminalis, anterior division, anteromedial area        | 359  |
| 1094 SSp-II4  | Primary somatosensory area, lower limb, layer 4                           | 337  | 510 SSp-II6b | Primary somatosensory area, lower limb, layer 6b                                | 337  |
| 162 LDT       | Laterodorsal tegmental nucleus                                            | 1117 | 358 SLD      | Sublaterodorsal nucleus                                                         | 1117 |
| 162 LDT       | Laterodorsal tegmental nucleus                                            | 1117 | 238 RPO      | Nucleus raphe pontis                                                            | 1117 |
| 757 VTN       | Ventral tegmental nucleus                                                 | 323  | 749 VTA      | Ventral tegmental area                                                          | 323  |
| 757 VTN       | Ventral tegmental nucleus                                                 | 323  | 246 RR       | Midbrain reticular nucleus, retrorubral area                                    | 323  |
| 757 VTN       | Ventral tegmental nucleus                                                 | 323  | 214 RN       | Red nucleus                                                                     | 323  |
| 889 SSp-n6a   | Primary somatosensory area, nose, layer 6a                                | 353  | 702 SSp-n5   | Primary somatosensory area, nose, layer 5                                       | 353  |
| 149 PVT       | Paraventricular nucleus of the thalamus                                   | 571  | 15 PT        | Parataenial nucleus                                                             | 571  |
| 604 NI        | Nucleus incertus                                                          | 1117 | 358 SLD      | Sublaterodorsal nucleus                                                         | 1117 |
| 307 MARN      | Magnocellular reticular nucleus                                           | 370  | 661 VII      | Facial motor nucleus                                                            | 370  |
| 907 PCN       | Paracentral nucleus                                                       | 51   | 599 CM       | Central medial nucleus of the thalamus                                          | 51   |
| 649 VISal6b   | Anterolateral visual area, layer 6b                                       | 402  | 601 VISal6a  | Anterolateral visual area, layer 6a                                             | 402  |
| 724 AHNp      | Anterior hypothalamic nucleus, posterior part                             | 88   | 708 AHNc     | Anterior hypothalamic nucleus, central part                                     | 88   |
| 591 CLI       | Central linear nucleus raphe                                              | 165  | 100 IPN      | Interpeduncular nucleus                                                         | 165  |
| 487 MEApd-c   | Medial amygdalar nucleus, posterodorsal part, sublayer c                  | 426  | 480 MEApd-b  | Medial amygdalar nucleus, posterodorsal part, sublayer b                        | 426  |
| 232 COAp13    | Cortical amygdalar area, posterior part, lateral zone, layer 3            | 655  | 224 COAp12   | Cortical amygdalar area, posterior part, lateral zone, layer 2                  | 655  |
| 377 VISpl6a   | Posterolateral visual area, layer 6a                                      | 425  | 902 VISpl5   | Posterolateral visual area, layer 5                                             | 425  |
| 454 CA2sr     | Field CA2, stratum radiatum                                               | 423  | 446 CA2sp    | Field CA2, pyramidal layer                                                      | 423  |
| 1113 IAD      | Interanterodorsal nucleus of the thalamus                                 | 239  | 155 LD       | Lateral dorsal nucleus of thalamus                                              | 239  |
| 503 SCig-b    | Superior colliculus, motor related, intermediate gray layer, sublayer b   | 10   | 511 SCig-c   | Superior colliculus, motor related, intermediate gray layer, sublayer c         | 10   |
| 634 NPC       | Nucleus of the posterior commissure                                       | 1100 | 215 APN      | Anterior pretectal nucleus                                                      | 1100 |
| 613 VISI5     | Lateral visual area, layer 5                                              | 409  | 421 VISI1    | Lateral visual area, layer 1                                                    | 409  |
| 56 ACB        | Nucleus accumbens                                                         | 493  | 998 FS       | Fundus of striatum                                                              | 493  |
| 578 BSTpr     | Bed nuclei of the stria terminalis, posterior division, principal nucleus | 367  | 585 BSTif    | Bed nuclei of the stria terminalis, posterior division, interfascicular nucleus | 367  |
| 676 DMHp      | Dorsomedial nucleus of the hypothalamus, posterior part                   | 830  | 668 DMHa     | Dorsomedial nucleus of the hypothalamus, anterior part                          | 830  |
| 360 DP2/3     | Dorsal peduncular area, layer 2/3                                         | 814  | 496 DP1      | Dorsal peduncular area, layer 1                                                 | 814  |
| 479 CA3slu    | Field CA3, stratum lucidum                                                | 463  | 495 CA3sp    | Field CA3, pyramidal layer                                                      | 463  |
| 511 SCig-c    | Superior colliculus, motor related, intermediate gray layer, sublayer c   | 10   | 494 SCig-a   | Superior colliculus, motor related, intermediate gray layer, sublayer a         | 10   |
| 778 VISp5     | Primary visual area, layer 5                                              | 385  | 721 VISp4    | Primary visual area, layer 4                                                    | 385  |
| 310 SF        | Septofimbrial nucleus                                                     | 275  | 333 SH       | Septohippocampal nucleus                                                        | 275  |
| 638 GU6a      | Gustatory areas, layer 6a                                                 | 1057 | 662 GU6b     | Gustatory areas, layer 6b                                                       | 1057 |
| 764 ENT12b    | Entorhinal area, lateral part, layer 2b                                   | 918  | 715 ENT12a   | Entorhinal area, lateral part, layer 2a                                         | 918  |
| 1046 VISam6a  | Anteromedial visual area, layer 6a                                        | 394  | 441 VISam6b  | Anteromedial visual area, layer 6b                                              | 394  |
| 668 DMHa      | Dorsomedial nucleus of the hypothalamus, anterior part                    | 830  | 684 DMHv     | Dorsomedial nucleus of the hypothalamus, ventral part                           | 830  |
| 1127 TEa2/3   | Temporal association areas, layer 2/3                                     | 541  | 234 TEa4     | Temporal association areas, layer 4                                             | 541  |
| 875 PBle      | Parabrachial nucleus, lateral division, external lateral part             | 881  | 891 PBlv     | Parabrachial nucleus, lateral division, ventral lateral part                    | 881  |
| 1096 AMd      | Anteromedial nucleus, dorsal part                                         | 127  | 1104 AMv     | Anteromedial nucleus, ventral part                                              | 127  |
| 440 ORBl6a    | Orbital area, lateral part, layer 6a                                      | 723  | 630 ORB15    | Orbital area, lateral part, layer 5                                             | 723  |
